# Supplementary material for: Test-trace-isolate-quarantine (TTIQ) intervention strategies after symptomatic COVID-19 case identification
Source: PubMed Central journal article supplement (PMC8836351; doi:10.1371/journal.pone.0263597), 2022-02-11
Supplement: pone.0263597.s003.pdf [file pone.0263597.s003.pdf]

## S3 Appendix. Supplementary results – Overdispersion

For manuscript “Test-trace-isolate-quarantine (TTIQ) intervention strategies after symptomatic COVID-19 case identification”

Peter Ashcroft<sup>1\*</sup>, Sonja Lehtinen<sup>1</sup>, Sebastian Bonhoeffer<sup>1\*</sup>

<sup>1</sup> Institute of Integrative Biology, ETH Zurich, Switzerland

\* peter.ashcroft@env.ethz.ch (PA); seb@env.ethz.ch (SB)

### Overdispersion

We have focused our analysis around a fixed baseline reproductive value  $R$ ; i.e. all individuals would infect  $R$  contacts in the absence of TTIQ. Now let us assume that the reproductive value per individual is sampled from an overdispersed negative binomial distribution with dispersion parameter  $k$  and mean  $R$ . In particular, let the index case infect  $R_I$  secondary cases in the absence of TTIQ, where

$$R_I \sim \text{NB}(k, k/(k + R)). \quad (\text{S3.1})$$

Now each secondary case  $i \in \{1, 2, \dots, R_I\}$  infects  $R_{S,i} \sim \text{NB}(k, k/(k + R))$  tertiary cases such that, in the absence of TTIQ,

$$n_3 = \sum_{i=1}^{R_I} R_{S,i} \sim \text{NB}(kR_I, k/(k + R)), \quad (\text{S3.2})$$

This distribution follows from the fact that negative-binomially distributed numbers can be represented as the sum of  $k$  geometrically distributed numbers, and so the sum of negative binomials is also a negative binomial with appropriate size parameter.

The impact of overdispersion of the contact number distribution in the model is only felt on the baseline reproduction number  $R$ , which is factored-out of the expressions for the number of secondary or tertiary cases in the presence of TTIQ:

$$n_2 = R_I \times F(f, \Delta_1), \quad (\text{S3.3})$$

$$n_3 = \left( \sum_{i=1}^{R_I} R_{S,i} \right) \times G(f, \Delta_1, g, \Delta_2, \tau). \quad (\text{S3.4})$$

Therefore, the variance of  $n_2$  will be directly proportional to the variance of  $R_I$ , while the mean will be unchanged from the fixed- $R$  approach that we have used.

Our reproductive number, which is defined as the ratio  $R_{\text{TTIQ}} = n_3/n_2$ , then follows the distribution

$$\frac{n_3}{n_2} = \frac{X(R_I)}{R_I} \times \frac{G(f, \Delta_1, g, \Delta_2, \tau)}{F(f, \Delta_1)}, \text{ where } \begin{cases} X(R_I) \sim \text{NB}(kR_I, k/(k+R)) \\ R_I \sim \text{NB}(k, k/(k+R)). \end{cases} \quad (\text{S3.5})$$

In Fig. I, we see that the expectation value of  $n_3/n_2$  (which is  $E[X(R_I)/R_I]$  in the absence of TTIQ and scaled by a constant independent of  $k$  otherwise) is equal to  $R$ , while the variance of  $n_3/n_2$  has the same  $k$ -dependent shape as the negative binomial ( $n_2$ ), but with a slightly lower magnitude. Hence, overdispersal does not affect our mean predictions, but it could lead to increased variance/uncertainty in those predictions.

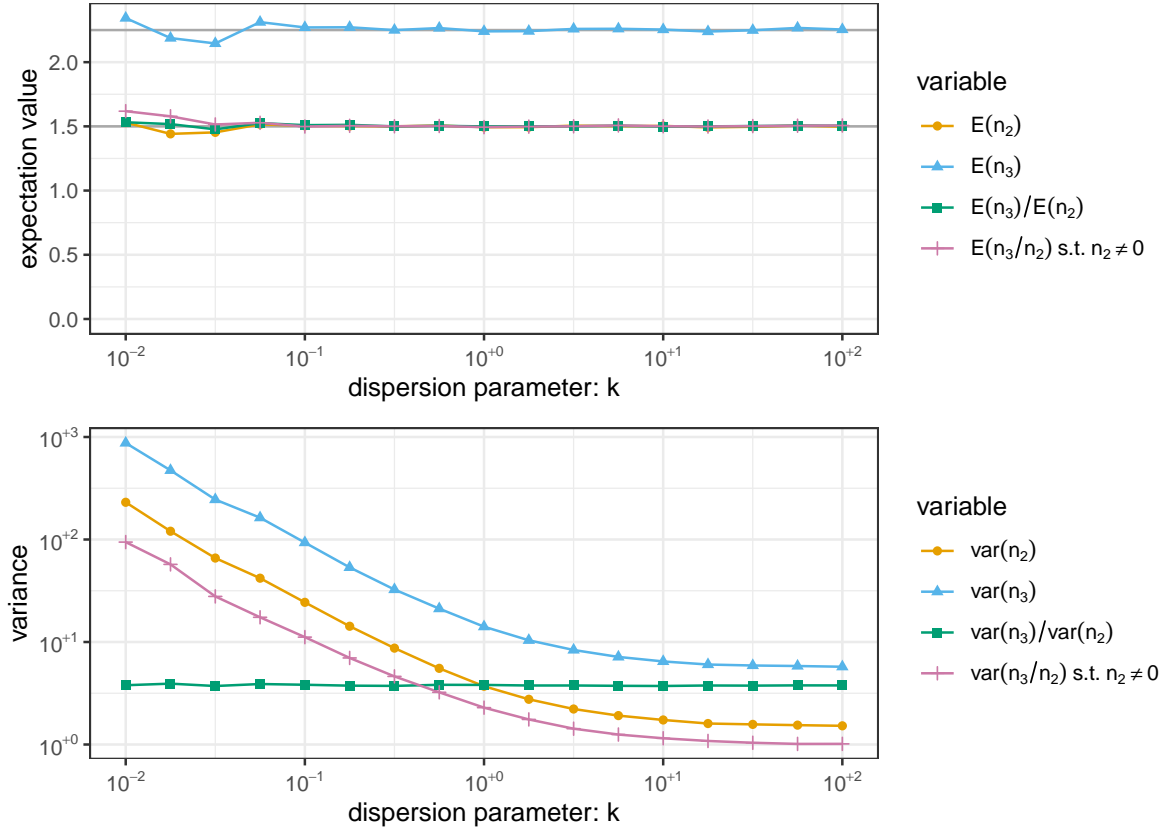

**Fig I. The impact of overdispersion on the effective reproduction number.** The number of contacts per index and secondary cases follow the same negative binomial distribution with mean  $R = 1.5$  and dispersion parameter  $k$  (x-axis). Here we have assumed no TTIQ, such that  $F(f, \Delta_1) = G(f, \Delta_1, g, \Delta_2, \tau) = 1$ . Data provided in S1 Dataset.
