# Supplementary material for: Test-trace-isolate-quarantine (TTIQ) intervention strategies after symptomatic COVID-19 case identification
Source: PubMed Central journal article supplement (PMC8836351; doi:10.1371/journal.pone.0263597), 2022-02-11

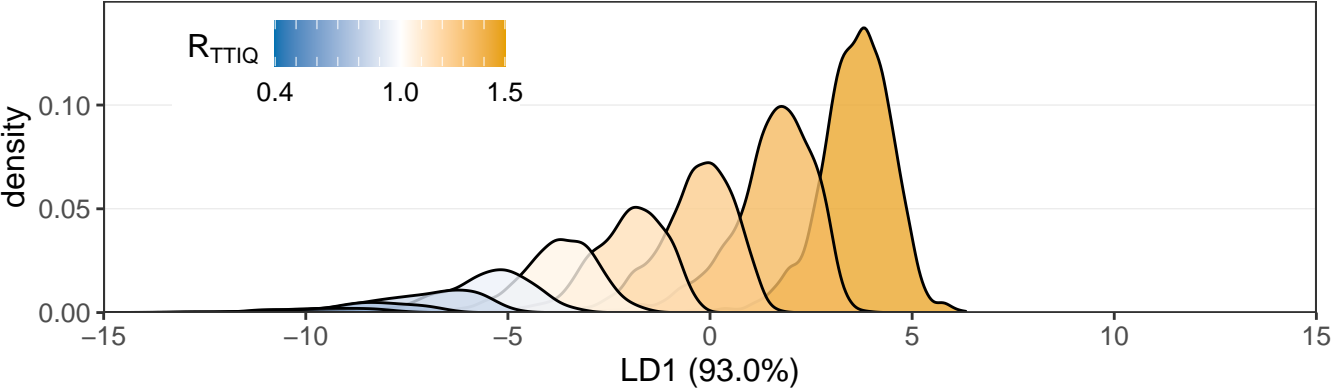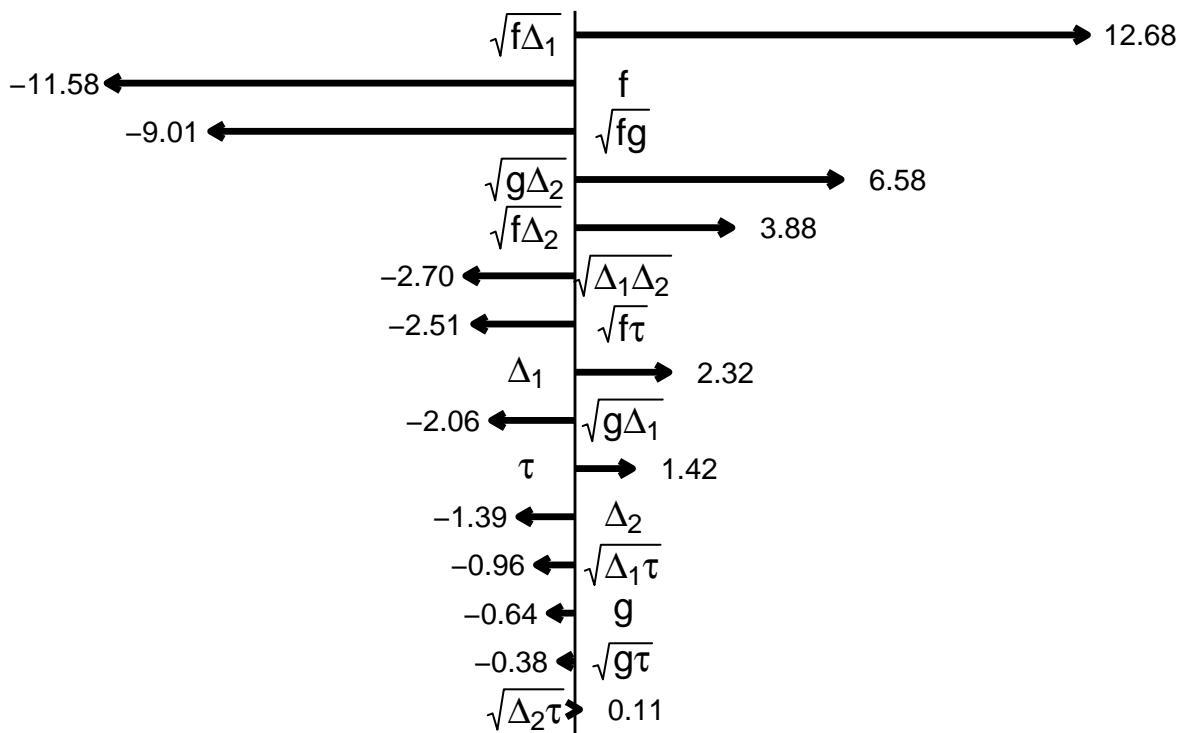

Supplement: pone.0263597.s007.pdf [file pone.0263597.s007.pdf]
