# Supplementary material for: Test-trace-isolate-quarantine (TTIQ) intervention strategies after symptomatic COVID-19 case identification
Source: PubMed Central journal article supplement (PMC8836351; doi:10.1371/journal.pone.0263597), 2022-02-11
Supplement: pone.0263597.s009.pdf [file pone.0263597.s009.pdf]

# Response to Reviewer comments:

## 1 Test-trace-isolate-quarantine (TTIQ) intervention strategies 2 after symptomatic COVID-19 case identification

3 **Peter Ashcroft<sup>1</sup>, Sonja Lehtinen<sup>1</sup>, and Sebastian Bonhoeffer<sup>1</sup>**

4 <sup>1</sup>*Institute of Integrative Biology, ETH Zurich, Switzerland*

---

5 Dear Editor,

6 we here include a description of the changes that have been made to the manuscript  
7 after review at PLOS ONE (PONE-D-21-26262). We believe the quality of the manuscript  
8 has been improved based on the comments of the two anonymous reviewers, to  
9 whom we show our gratitude. In addition to the changes described below, we have  
10 modified the structure of the supplementary information (and references thereto)  
11 to reflect the house style of PLOS ONE. We hope this revised manuscript is now  
12 suitable for publication in PLOS ONE.

13 Kind regards,

14 Peter Ashcroft, Sonja Lehtinen, and Sebastian Bonhoeffer

### 15 **Comments from the Editor**

16 I found this manuscript to be thoughtfully and clearly written. I think the defini-  
17 tion of  $R = R_3/R_2$  is a novel and useful metric for evaluating TTIQ. I also like the  
18 interactive graphic. Meanwhile, please address all comments made by the review-  
19 ers. Reviewer 1's insightful comments should help to enrich the paper. However  
20 per PLOS One's publication criteria it is not necessary to pursue additional anal-  
21 yses - provided the model is clearly articulated and limitations are identified. In  
22 addition, I like Reviewer 2's suggestion to make code available and to include a  
23 paragraph that relates the methodological results to specific public health interven-  
24 tions. Please note that Reviewer 2's listed references on transmission heterogeneity  
25 do not need to be included.

26 **Response:** We thank the PLOS ONE Academic Editor Dr. Seth Blumberg for  
27 considering and carefully reviewing this article, and for their positive comments.  
28 As described below, all data and code are publicly available and we included a dis-  
29 cussion paragraph to reinforce the public health impact of this work. We have also  
30 made clarifications to the model description and the limitations of our branching  
31 process approach.

### 33 **Comments from Reviewer #1:**

34 **Summary:** In their manuscript, Ashcroft and coauthors propose a branching pro-  
35 cess model to assess the effectiveness of test-trace-isolate-quarantine TTIQ inter-  
36 ventions on the containment of COVID-19. Their findings are overall consistent  
37 with the large body of evidence showing that TTI may help curb the spread of in-  
38 fectious diseases — if done properly [1–6]. However, while the authors incorporate  
39 great detail into the transmission of COVID-19 by using empirical distributions for

40 the generation/serial intervals and the time from contagion to symptoms onset,  
41 imperfections of the TTIQ interventions and all connection with its real-life imple-  
42 mentation and its challenges are overseen (e.g., imperfect isolation, limited contact  
43 tracing capacity, the cost-effectiveness of quarantining large fractions of the popu-  
44 lation [2–4,6]). Below find some observations for improvement.

45 **Response:** We thank this Reviewer for carefully and thoroughly reading our  
46 manuscript, and for their critical comments which have helped to enrich the paper.  
47 We agree that we have focussed on idealised scenarios of TTIQ implementation –  
48 this is intentional as we wanted to quantify the upper bound of TTIQ effectiveness  
49 provided that the resources are provided and the policies are adhered too. Actually  
50 getting people to adhere to isolation/quarantine or having enough contact tracing  
51 capacity is a question for sociologists and economists, rather than infectious dis-  
52 ease experts. We therefore focus on using the quantified dynamics of transmission,  
53 rather than the studies of human behaviour which greatly vary from country to  
54 country. We have addressed all detailed queries as described below, and we hope  
55 the Reviewer finds our clarifications suitable.

56  
57 **Comment 1.1:** Currently, there is no category for recovered/vaccinated individu-  
58 als — how does epidemic spread affect the baseline reproduction number? How  
59 do the authors compute current COVID-19 incidence?

60 **Response:** In our model there is no immune class for the individuals. This is  
61 compatible with the branching process approach that we apply, which is relevant  
62 during early stages of epidemic outbreak when the susceptible population is much  
63 larger (formally the population size is infinite) than the combined infected or im-  
64 mune population. The baseline reproductive number in the model therefore is not  
65 changed within the analysis – it is a fixed parameter. Of course, the value of this  
66 parameter can be changed to represent changes in the epidemiological scenario –  
67 decreasing due to increases population immunity and fluctuating due to seasonal-  
68 ity and relaxation/imposition of social distancing policies. Our results are therefore  
69 illustrated over a range of baseline reproductive numbers.

70 Due to the framework and our mathematical definition of the reproductive  
71 number  $R_{\text{TTIQ}}$ , the results related to parameter effect/importance are independent  
72 of the chosen baseline reproduction number, so for this part of the analysis the  
73 choice of  $R$  doesn't matter.

74 Finally, we do not compute COVID-19 incidence in this analysis.

75 In response to this comment, as well as further comments below, we have ex-  
76 plicitly stated the assumptions that the branching process imposes, and we further  
77 discuss these assumptions as limitations in the discussion. Specifically, in the first  
78 paragraph of *Materials and Methods* we now say: “The branching process model  
79 assumes discrete generations of transmission and an infinite population size, such  
80 that the expected number of secondary infections per infected is the same across  
81 generations. We therefore do not explicitly include the depletion of susceptibles  
82 due to death or acquired immunity during epidemic spread and/or vaccination  
83 campaigns. The initial infected individual ...”. Furthermore, in paragraph 4 of  
84 *Materials and Methods* when we introduce the baseline reproduction number, we  
85 clarify that it can be influenced by the population's immunity status: “The  $R$ -value  
86 will also be proportional to the size of the susceptible pool – which can be depleted  
87 due to death or acquired immunity – such that epidemic spread and vaccination  
88 campaigns will result in a smaller baseline  $R$ -value.”. Finally, in *Discussion* we de-  
89 scribe the limitations of the branching process approach: “Our analysis is, to some  
90 extent, limited by the assumptions which underlie the branching process frame-

91 work. The infinite population size assumption prevents us from computing the  
92 fraction of population that is infected, or from a socioeconomic point of view the  
93 fraction of population quarantined at a given time. Furthermore, with the branch-  
94 ing process we cannot observe long-term effects caused by depleting susceptibles  
95 through quarantine, immunity, or death. However, the branching process approach  
96 is valid over short time scales (like the two generations of transmission that we cal-  
97 culate), provided that the susceptible population size is much larger than  $R^2$ . The  
98 effect of susceptible depletion can also be incorporated by lowering the baseline  
99 reproductive value  $R$  in the model.”.

100  
101 **Comment 1.2:** What kind of contact tracing is here considered? If manual, there  
102 should be a maximum incidence from which no more contacts could be treated or  
103 only primary contacts would be prioritized (e.g.,  $\tau \rightarrow 0$  in the notation used in the  
104 manuscript) [3,4]. If digital contact tracing was used, how is the threshold defined?  
105 What’s the cost of quarantine and the fraction of the population currently isolated?  
106 see, e.g., [6]

107 **Response:** We do not specify between manual versus digital contact tracing,  
108 as we are trying to capture the general act of tracing & quarantining by allow-  
109 ing changeable parameter combinations. For example, for digital contact tracing  
110  $g$  would increase with the square of the rate of app uptake. As the Reviewer sug-  
111 gests, reducing the duration  $\tau$  in which contacts during the pre-symptomatic phase  
112 are traced, or the fraction of contacts successfully traced  $g$ , impact the number and  
113 which specific contacts are traced. Hence, reducing  $\tau$  or  $g$  would reflect limited  
114 contact tracing capacity.

115 The costs of quarantine – as computed in Lunz et al. (i.e. the total quarantine  
116 days accumulated in a population) or through the fraction of the population quar-  
117 antined at a given time – are more socio-economical constructs than epidemiological  
118 and therefore we believe that they are beyond the scope of this infectious disease  
119 dynamics paper. This is one reason why we opted to use the simpler branching  
120 process approach. Because this approach assumes an infinite population size, we  
121 cannot compute a fraction of individuals in quarantine/isolation at a given time.  
122 Furthermore, computing a cost of quarantine as done in Lunz et al. is not possible  
123 as we don’t track individuals who are falsely quarantined: we only track infecteds.

124 In response, to this comment, we have added to the Materials and Methods  
125 that contact tracing can be digital or manual, and that the contact tracing param-  
126 eters can be adjusted to reflect these different settings: “Furthermore, contact tracing  
127 can also be achieved through digital app-based technology (Ferretti et al., 2020). The  
128 proposed model applies to both manual and digital contact tracing, but we note  
129 that we would expect different parameter combinations for digital versus manual  
130 contact tracing, for example reduced delays  $\Delta_2$  for digital contact tracing (Ferretti  
131 et al., 2020; Kretzschmar et al., 2020).”

132  
133 **Comment 1.3:** The definition of *symptoms* is ambiguous; do the authors refer to  
134 COVID-specific symptoms, like loss of smell/taste or other less common symp-  
135 toms? [7] This could affect the value of  $a$  and  $\alpha$ . How do symptoms-specificity  
136 relate to testing criteria in the event of high COVID-19 incidence?

137 **Response:** Thank you for the clarification, we are indeed focussing on COVID-  
138 specific symptoms, which would lead an individual to undergo testing for the pres-  
139 ence of SARS-CoV-2. We have modified our text in Materials and Methods to re-  
140 flect this: “Individuals who develop symptoms that are indicative of COVID-19 can  
141 be tested and subsequently isolated from the population.” We define symptomatic

142 versus asymptomatic infection as used in Buitrago-Garcia *et al.* (2020): asymptomatic  
143 cases are those who have no symptoms upon initial reporting and had no symp-  
144 toms at the end of the follow-up period (i.e. 14 days after infection), such that they  
145 would not visit a point of care testing facility. This is where our value of  $a \sim 20\%$   
146 comes from, although we perform multiple sensitivity analyses over the contri-  
147 bution of asymptomatics. Symptom specificity and finite testing capacity are not  
148 features of our current analyses, so we cannot comment on the role of symptom  
149 specificity and testing during high incidence periods.

150  
151 **Comment 1.4:** How does the baseline reproduction number relate to the data-  
152 driven, testing-dependent observed reproduction number? How does the latter  
153 relate to  $R_0$ ,  $R_{\text{TTIQ}}$ , and  $R_{\text{TI}}$ ? All reproduction numbers should share the tipping  
154 point at  $R = 1$ , but their absolute value depends on the assumptions of the genera-  
155 tion interval.

156 **Response:** Our baseline reproduction number  $R$  would be higher than the cur-  
157 rent observed, testing-dependent  $R_t$ , as TTIQ has already impacted this observed  
158 value. If we had data on current TTIQ parameters  $(f, g, \Delta_1, \Delta_2, \tau)$ , as well as the ob-  
159 served reproductive value, we could back-calculate the current baseline reproduc-  
160 tion number. As the baseline  $R$  does account for the presence of hygiene and social  
161 distancing measures, as well as the current epidemiological scenario (immunity,  
162 seasonality, etc.), it will be lower than the true  $R_0$  (no intervention, fully suscepti-  
163 ble population) of SARS-CoV-2. Hence we have  $R_t < R < R_0$ . The values  $R_{\text{TTIQ}}$   
164 and  $R_{\text{TI}}$  represent specific TTIQ efficacy scenarios which satisfy  $R_{\text{TTIQ}} \leq R_{\text{TI}} \leq R$ .  
165 To improve the clarity of the definition of  $R$ , we have included a comparison to  
166 the basic reproductive number  $R_0$ , as well as the observed effective reproductive  
167 number: “As we are interested in quantifying the effects of TTIQ strategies, we  
168 introduce the parameter  $R$  which represents the effective reproductive number of  
169 the virus in the presence of interventions such as mask-wearing, social distancing,  
170 school closures etc., but in the absence of isolation and quarantine. We refer to this  
171  $R$  parameter as “the baseline  $R$ -value in the absence of TTIQ”, and we have  $R \leq R_0$  due  
172 to the presence of the non-TTIQ preventative measures. Furthermore, the baseline  
173 reproductive number  $R$  should be greater than or equal to the currently observed  
174 effective reproductive number, which includes the impact of in-place TTIQ mea-  
175 sures.”

176  
177 **Comment 1.5:** Despite being conceptually different, isolation and quarantine are  
178 implemented in the same way in the model (i.e., individuals are removed from  
179 the infectious pool and do not contribute further to spread). Isolation/Quarantine  
180 is deemed imperfect, as individuals share households, choose not to comply with  
181 the instructions, or hide their diagnosis because of economic pressure. The above  
182 would lead to identified (suspected) and unidentified new infections, contributing  
183 further to the spread.

184 **Response:** In our model we do account – to some extent – for imperfect in-  
185 terventions with the parameters  $f$  and  $g$ . We allow these parameters to take on  
186 a range of values because we are not confident in their empirical values, due to  
187 the effects of non-adherence etc. Of the fraction of the infecteds that are isolated  
188 or quarantined, we assume that all transmission is prevented once removed from  
189 the infectious pool, while the remaining fraction (asymptomatics, those who were  
190 not tested, those with a false-negative test result, and those not found by contact  
191 tracers) remain infectious.

192 The effects of adherence to quarantine can easily be accounted for in the param-

193 eter  $g$ , the probability for a secondary contact to be effectively quarantined. Lack of  
194 adherence to isolation can be accounted for in  $f$ , as long as this lack of adherence  
195 also means that their contacts are not traced. We now expand on these adherence  
196 assumptions in Materials and Methods when each parameter is introduced:

197  $f$ : “For those individuals who are isolated, we assume that they cannot infect  
198 further for the remaining duration of their infectious period. This assumption of  
199 perfect adherence to isolation once tested positive will lead to an overestimation  
200 of TTIQ effectiveness. Any lack of adherence to isolation could be accounted for  
201 in the model by reducing  $f$ , as long as this lack of adherence also means that their  
202 contacts are not traced.”

203  $g$ : “For those who are quarantined, we assume that they cannot infect further  
204 for the remaining duration of their infectious period. This assumption of perfect  
205 adherence to quarantined once identified through contact tracing will lead to an  
206 overestimation of TTIQ effectiveness. However, any lack of adherence to isolation  
207 is easily accounted for in the model by reducing  $g$ .”

208  
209 **Comment 1.6:** What are the testing rates and absolute values behind  $f$  and  $g$ ? For  
210  $f$ , the sensitivity of self-administrated tests is considerably lower than point-of-care  
211 administrated tests [8], and thus higher rates of false negatives would arise. On the  
212 other hand, point-of-care tests are limited, and individuals showing symptoms are  
213 told not to go there, thus also favoring underreporting. For a given value of  $f$ , how  
214 many tests per million per day have to be administrated? And for a given value of  
215  $g$  and an average number of close contacts per index case, how many calls have to  
216 be performed by the tracing agencies before finding a  $g\%$  of the newly generated  
217 cases? Is it reasonable to assume that all of them would be found exactly  $\Delta_2$  days  
218 after the report? How does the model deal with individuals that are simultaneously  
219 identified as close contact and index case?

220 **Response:** Testing coverage  $f$  and contact tracing success  $g$  are likely to be  
221 very different between countries. In our experience, it is difficult to attain such  
222 information in Switzerland. For these reasons, we chose to keep  $f$  and  $g$  as free  
223 parameters. As our predicted  $R_{\text{TTIQ}}$  values are linearly-dependent on  $f$  and  $g$ , it  
224 doesn't matter where we are currently with these values: an absolute change in  $f$   
225 or  $g$  will lead to the same absolute change in  $R_{\text{TTIQ}}$  (i.e.  $dR_{\text{TTIQ}}/df$  and  $dR_{\text{TTIQ}}/dg$   
226 are constant). Following our parameter summary in Materials and Methods, we  
227 now describe the rationale for keeping  $f$  and  $g$  as free parameters: “Due to the  
228 high between-country variability of testing coverage ( $f$ ), contact tracing success  
229 ( $g$ ), and the respective delays, as well as the lack of publicly-available data on these  
230 topics, we keep these values as free parameters in our analyses.”

231 In our model we cannot comment on metrics such as number of tests per day  
232 as we do not consider a population model. This metric will depend on the cur-  
233 rent incidence level, which we do not calculate. Furthermore, we assume that  
234 positive self-administered (rapid) tests are backed-up by point-of-care confirma-  
235 tory tests to initiate contact tracing. Any delay is captured in the parameter  $\Delta_1$ ,  
236 and any false-negatives of the self-administered tests are included in the fraction  
237  $f$ . We now expand upon this in Materials and Methods: “The fraction isolated  
238  $f$  can also be reduced by false-negative results based on potentially less-sensitive  
239 self-administered tests, which could prevent infected individuals from seeking con-  
240 firmatory point-of-care tests.”

241 For  $g$ , we cannot comment on the number of calls without assuming a value for  
242 the number of daily contacts, which is not part of our model.

243 The constant delay values  $\Delta_1$  and  $\Delta_2$  are of course simplifying assumptions, and



244 we discuss the impact of distributed delays in the response to minor comment 1.8  
245 below.

246  
247 **Comment 1.7:** I wonder whether it is correct to compare the efficacy of testing-  
248 isolating and tracing-quarantining in absolute terms. As I understand it, contact  
249 tracing cannot happen without testing; thus, it is conditional to it.

250 **Response:** This is another interesting point: should we report the absolute de-  
251 crease in the reproductive number for the different strategies, or should we report  
252 the relative effect? Ultimately it is important to know if an intervention leads to  
253  $R < 1$ , so we display results in the absolute. However, we expect that different  
254 public health authorities would each prefer a different method, so we therefore  
255 provide the tools to calculate both. In our model, as  $R_{TI}$  and  $R_{TTIQ}$  are proportional  
256 to the baseline reproductive number  $R$ , calculating the relative effect is a straight  
257 forward task.

258  
259 **Comment 1.8:** There is something odd with Figure S6; I would have expected  
260 the trends to be the other way around (if analyzed conditional one to each other).  
261 Currently, it seems that to improve the efficacy of contact tracing, we would have  
262 to miss more cases in the testing stage.

263 **Response:** This is a very interesting point which we can attribute to seman-  
264 tics. First we note that absolute effectiveness (reduction of the reproductive num-  
265 ber,  $Y(g) = R_{\text{baseline}} - R_{\text{TTIQ}}(g)$  as described in the figure caption) is an increas-  
266 ing function of both  $f$  and  $g$ : any increase in either of these parameters increases  
267 TTIQ effectiveness. Now, when we compare  $R_{\text{TTIQ}}(g)$  and  $R_{\text{TTIQ}}(0)$  (just isolation),  
268 there is an overlap of individuals who would be removed from the transmission  
269 pool by both symptomatic isolation and by quarantine following contact tracing.  
270 When we take the difference between these  $R$  values, as we do in Figure S6 (now  
271 S1 Fig), we are just computing how much extra transmission is prevented by quar-  
272 antine, which may just be one days worth of transmission before the individual  
273 becomes symptomatic and would be isolated anyway. By increasing  $f$ , we isolate  
274 more symptomatic cases and this outweighs the extra transmission prevented by  
275 quarantining them one day earlier than they would be isolated. If we were instead  
276 to categorise transmission as prevented by quarantine or isolation depending on  
277 which event happens first, we would expect to see a reversal with higher  $f$  lead-  
278 ing to more transmission attributable to quarantine. But ultimately, we are here  
279 interested in the extra benefit that quarantine brings to the overall reduction.

280 In summary, increasing  $f$  decreases the extra benefit of contact tracing because  
281 increased isolation decreases the transmission potential of infected contacts which  
282 could be prevented by quarantine.

283 We have addressed this issue by relabelling the figure y-axis label as the fraction  
284 “((transmission prevented by isolation & quarantine) - (transmission prevented by  
285 isolation)) / (transmission prevented by isolation & quarantine)”, as well as mod-  
286 ifying the caption: “Note that we are computing how much extra transmission is  
287 prevented by quarantine, which may just be one days worth of transmission before  
288 the contact becomes symptomatic and would anyway be isolated.”

289  
290 **Minor comment 1.1:** Abstract and throughout the manuscript: currently, it reads  
291 "SARS-CoV-2 pandemic", but it should be "COVID-19 pandemic", as the latter refers  
292 to the disease.

293 **Response:** Thank you for this clarification. We have made appropriate changes

294 to the Abstract, as well as in the Author Summary and Introduction, to rectify this.

295  
296  
297 **Minor comment 1.2:** There are parts in the introduction that would better fit (and  
298 are redundant with) the discussions section.

299 **Response:** We thank the Reviewer for this suggestion. We have now shortened  
300 the discussion of previous work in the introduction, and moved the reasoning for  
301 differences between outcomes in these studies to the discussion.

302  
303 **Minor comment 1.3:** Lines 126–128: missing reference?

304 **Response:** Thank you, we have now added Moore et al. and Sonabend et al.  
305 as supporting references for the ongoing use of non-pharmaceutical interventions  
306 despite vaccination coverage.

307 • Moore, S., Hill, E. M., Tildesley, M. J., Dyson, L., & Keeling, M. J. (2021). Vaccina-  
308 tion and Non-Pharmaceutical Interventions for COVID-19: A Mathematical Mod-  
309 elling Study. *The Lancet Infectious Diseases*, 21(6), 793–802, [https://doi.org/10.1016/  
310 S1473-3099\(21\)00143-2](https://doi.org/10.1016/S1473-3099(21)00143-2).

311 • Sonabend, R., et al. (2021). Non-Pharmaceutical Interventions, Vaccination, and  
312 the SARS-CoV-2 Delta Variant in England: A Mathematical Modelling Study. *The  
313 Lancet*, 0(0), [https://doi.org/10.1016/S0140-6736\(21\)02276-5](https://doi.org/10.1016/S0140-6736(21)02276-5).

314  
315 **Minor comment 1.4:** Figures in general: perhaps larger tick labels and larger fonts  
316 for figure legends

317 **Response:** Thank you for the comment. We have adjusted the font sizes in  
318 all figures in the main text and appendices to improve readability of tick labels an  
319 legends.

320  
321 **Minor comment 1.5:** Discussion: (e.g., lines 418–422) Sensitivity analysis is typi-  
322 cally included in the supplementary materials, as in the study of Kretzschmar and  
323 coauthors [9].

324 **Response:** We thank the Reviewer for pointing this out. We were aware of these  
325 sensitivity analyses, but we didn't convey our point very clearly in the discussion.  
326 While there is a sensitivity analysis to varying the testing coverage in the Suppl.  
327 Mat. of Kretzschmar et al., there is no analysis of varying multiple parameters (e.g.  
328 testing coverage and isolation delay) at once. In our analyses in which we do this,  
329 we find that there are significant interactions between parameters, such that at long  
330 delays the effect of changing coverage doesn't have a large effect, but for shorter  
331 delays the sensitivity to testing coverage is increased. We now describe this in the  
332 discussion with the following text: "... They [Kretzschmar et al.] further showed  
333 that the effective reproductive number was insensitive to varying the testing cover-  
334 age, although only at a fixed delay of four days between symptom onset and index  
335 case isolation. Based on our systematic LDA analysis with quadratic parameters  
336 (S4 Fig), we know that there is considerable interaction between testing coverage  
337  $f$  and isolation delay  $\Delta_1$ . Therefore, we expect that sensitivity to testing coverage  
338 would appear at shorter delay values, and on average across these parameters we  
339 show that increasing  $f$  has a greater effect on the reproductive number than de-  
340 creasing  $\Delta_1$ ."

341  
342 **Minor comment 1.6:** A sensitivity analysis for the asymptomatic fraction should

343 also be performed (as it depends on testing criteria and it's likely to impact the  
344 effectiveness of testing policies)

345 **Response:** We have performed a new sensitivity analysis for the fraction of  
346 transmission that is attributable to asymptomatic infections,  $\alpha$ , as shown in new  
347 Figure I in S2 Appendix. The actual asymptomatic fraction  $a$  is absorbed into this  $\alpha$   
348 parameter, such that any change in  $a$  represents a change in  $\alpha$ . Therefore a sensitiv-  
349 ity analysis of  $a$  would be redundant. This sensitivity analysis shows, as expected,  
350 that increased asymptomatic transmission leads to poorer TTIQ performance. In-  
351 creasing testing coverage still has the largest impact on  $R_{\text{TTIQ}}$ . Together, we believe  
352 that Figures I, II, and III in S2 Appendix provide a comprehensive overview of the  
353 effect that asymptomatics have on our predictions.

354 **Minor comment 1.7:** How would random testing be implemented in this frame-  
355 work?  
356

357 **Response:** Random testing, for example mass or surge testing, or being tested  
358 to obtain a COVID certificate, can be implemented by allowing a probability for  
359 asymptomatic or presymptomatic cases to be identified as index cases (still ac-  
360 counting for test sensitivity). Because random testing could find secondary con-  
361 tacts before the index case is identified, we would have to correspondingly reduce  
362 the size of the contact pool ( $R$ ) from which we would try to identify and quarantine  
363 exposed individuals. Therefore random testing has the triple benefit of increas-  
364 ing index case identification and isolation, reducing the time that these index cases  
365 are infectious and non-isolated, and reducing the number of secondary contacts  
366 that have to be found by contact tracing. In the discussion, we now add the fol-  
367 lowing text: "In this scenario it would be possible to identify asymptomatic index  
368 cases, as well as identifying eventually-symptomatic cases before symptom onset.  
369 Through this increased index case identification and isolation, as well as the re-  
370 duced time that these index cases are infectious and non-isolated, and also reduc-  
371 ing the number of secondary contacts that have to be identified by contact tracing,  
372 mass/random testing would therefore increase the overall performance of TTIQ."

373 **Minor comment 1.8:** Currently, delays are modeled as a fixed parameter. However,  
374 how late an individual receives a positive test result is a random variable likely  
375 to be overdispersed (and the same for contact tracing). Can the authors perhaps  
376 discuss how this would affect their results?  
377

378 **Response:** This is an interesting point, which to answer quantitatively would  
379 require multiple integrals to average over the distributions of  $\Delta_1$  (for index cases  
380 and non-identified secondary cases) and  $\Delta_2$ . We do not perform this additional  
381 analysis, but we would expect that the mean reduction in  $R_{\text{TTIQ}}$  is unchanged (as-  
382 suming our fixed values  $\Delta_1$  and  $\Delta_2$  are the means of the respective distributions),  
383 but we would generate additional uncertainty in our estimates. In fact, we already  
384 average over the infection-to-quarantine duration of secondary contacts (because  
385 of distributed infection times), so there would be just a further broadening of this  
386 distribution with unchanged mean. The individual effect of distributed delays  $\Delta_1$   
387 and  $\Delta_2$  can be seen from Figure 4: an index case with a long delay until test re-  
388 sult and isolation would lead to a large increase in  $R_{\text{TI}}$  or  $R_{\text{TTIQ}}$ , while individual  
389 contacts with a long delay until quarantine would lead to a lesser increase in  $R_{\text{TTIQ}}$ .

390 In response, we have clarified in Materials and Methods that we consider a  
391 fixed delay and added the followig text after introducing all TTIQ parameters: "In  
392 all analyses we focus on fixed TTIQ parameter values for all individuals in the  
393 branching process, as opposed to sampling each individual's parameters from a



394 distribution. This simplifies the visualisation and interpretation of results. We ex-  
395 pect that the averaged results when using distributed parameters would closely  
396 reflect our fixed-value results, but would lead to increased variance/uncertainty  
397 in our estimates. Heterogeneity in the individuals' baseline reproductive number  
398 (due to contact number and transmission heterogeneities) is addressed in S3 Ap-  
399 pendix."

400

## 401 References

- 402 [1] Kerr, C. C., Mistry, D., Stuart, R. M., Rosenfeld, K., Hart, G. R., Núñez, R. C.,  
403 ... & Klein, D. J. (2021). Controlling COVID-19 via test-trace-quarantine. *Nature*  
404 *communications*, 12(1), 1-12.
- 405 [2] Kretzschmar, M. E., Rozhnova, G., & van Boven, M. (2021). Isolation and contact  
406 tracing can tip the scale to containment of COVID-19 in populations with social  
407 distancing. *Frontiers in Physics*, 8, 677.
- 408 [3] Contreras, S., Dehning, J., Loidolt, M., Zierenberg, J., Spitzner, F. P., Urrea-  
409 Quintero, J. H., ... & Priesemann, V. (2021). The challenges of containing SARS-  
410 CoV-2 via test-trace-and-isolate. *Nature communications*, 12(1), 1-13.
- 411 [4] Contreras, S., Dehning, J., Mohr, S. B., Bauer, S., Spitzner, F. P., & Priesemann,  
412 V. (2020). Low case numbers enable long-term stable pandemic control without  
413 lockdowns. *arXiv preprint arXiv:2011.11413*.
- 414 [5] Gardner, B. J., & Kilpatrick, A. M. (2021). Contact tracing efficiency, transmis-  
415 sion heterogeneity, and accelerating COVID-19 epidemics. *PLOS Computational*  
416 *Biology*, 17(6), e1009122.
- 417 [6] Lunz, D., Batt, G., & Ruess, J. (2021). To quarantine, or not to quarantine: A the-  
418 oretical framework for disease control via contact tracing. *Epidemics*, 34, 100428.
- 419 [7] Nasserie, T., Hittle, M., & Goodman, S. N. (2021). Assessment of the Frequency  
420 and Variety of Persistent Symptoms Among Patients With COVID-19: A Systematic  
421 Review. *JAMA network open*, 4(5), e2111417-e2111417.
- 422 [8] Lindner, A. K., Nikolai, O., Kausch, F., Wintel, M., Hommes, F., Gertler, M.,  
423 ... & Denking, C. M. (2021). Head-to-head comparison of SARS-CoV-2 antigen-  
424 detecting rapid test with self-collected nasal swab versus professional-collected na-  
425 sopharyngeal swab. *European Respiratory Journal*, 57(4).
- 426 [9] Kretzschmar, Mirjam E., et al. "Impact of delays on effectiveness of contact  
427 tracing strategies for COVID-19: a modelling study." *The Lancet Public Health* 5.8  
428 (2020): e452-e459.
- 429 Buitrago-Garcia, D., et al. (2020). "Occurrence and Transmission Potential of Asymp-  
430 tomatic and Presymptomatic SARS-CoV-2 Infections: A Living Systematic Review  
431 and Meta-Analysis." *PLOS Medicine*, 17(9): e1003346

## 432 Comments from Reviewer #2

433 **Summary:** The authors present a well-written and devised study investigating  
434 the effect of test-trace-isolate-quarantine (TTIQ) strategies on SARS-CoV2 transmis-  
435 sion. Empirical distributions of the generation time, infectivity profile, and incuba-  
436 tion period are incorporated into a branching process model with parameters af-  
437 fecting reductions in the distribution of infectivity through time. Early isolation of  
438 index cases is found to be the most effective TTIQ strategy and the authors commu-  
439 nicate uncertainty in the results exceptionally well throughout. There are a number  
440 of typos and a couple aspects of the methods that are a bit unclear. In addition,

441 further discussion or incorporation of the effects of individual heterogeneities in  $R$   
 442 should be incorporated. Finally, making the code accessible in addition to the app  
 443 would be helpful for transparency/reproducibility and future derivative work.

444 **Response:** We thank the Reviewer for their kind comments and their con-  
 445 structive criticisms. We have responded to all comments below and modified the  
 446 manuscript accordingly.

447  
 448 **Comment 2.1:** Given the theoretical foundation in branching process theory, it's  
 449 worth investigating the implications of the variance of  $R$  on the results in addition  
 450 to its mean. Previous theoretical work on superspreading and the influence of the  
 451 dispersion parameter assuming  $R$  is negative binomially distributed have found  
 452 it's important. Especially given the impact of  $f$  (fraction of index cases identified),  
 453 this could lead to interesting insights. If nothing else, I think it's worth a paragraph  
 454 in the discussion, as my intuition is that it would affect the variance/confidence  
 455 intervals of the results and not so much the mean.

456 [1] Blumberg, S., & Lloyd-Smith, J. O. (2013). Comparing methods for estimating  
 457  $R_0$  from the size distribution of subcritical transmission chains. *Epidemics*, 5(3),  
 458 131-145.

459 [2] Blumberg, S., & Lloyd-Smith, J. O. (2013). Inference of  $R_0$  and transmission  
 460 heterogeneity from the size distribution of stuttering chains. *PLoS computational  
 461 biology*, 9(5), e1002993.

462 [3] Lloyd-Smith, J. O., Schreiber, S. J., Kopp, P. E., & Getz, W. M. (2005). Super-  
 463 spreading and the effect of individual variation on disease emergence. *Nature*,  
 464 438(7066), 355-359.

465 **Response:** We agree with the Reviewer that the overdispersal of contacts per  
 466 index case is an important epidemiological consideration.

Mathematically, in our model, the impact of overdispersal is only felt on the  
 baseline reproduction number  $R$ , which is factored-out of the expressions for the  
 number of secondary or tertiary cases. I.e.

$$n_2 = R \times F(f, \Delta_1), \quad (1)$$

$$n_3 = R^2 \times G(f, \Delta_1, g, \Delta_2, \tau). \quad (2)$$

467 Therefore, the variance of  $n_2$  will be directly proportional to the variance of  $R$ ,  
 468 while the mean will be unchanged from the fixed- $R$  approach that we have used.  
 469 For tertiary cases the calculation is a little more involved. Let us define  $R_I$  as the  
 470 number of secondary cases per index case in the absence of TTIQ, which we as-  
 471 sume to follow a negative binomial distribution with dispersion parameter  $k$  and  
 472 mean  $R$ :  $R_I \sim \text{NB}(k, k/(k + R))$ . Now each secondary case  $i \in \{1, 2, \dots, R_I\}$   
 473 infects  $R_{S,i} \sim \text{NB}(k, k/(k + R))$  tertiary cases in the absence of TTIQ, such that  
 474  $n_3 = \sum_{i=1}^{R_I} R_{S,i} \sim \text{NB}(R_I \times k, k/(k + R))$ . This last step follows from the fact that  
 475 negative-binomially distributed numbers can be represented as the sum of  $k$  geo-  
 476 metrically distributed numbers, and so the sum of negative binomials is also a neg-  
 477 ative binomial with appropriate size parameter. Our reproductive number, which  
 478 is defined as the ratio  $n_3/n_2$ , then follows the distribution

$$\frac{n_3}{n_2} = \frac{X(R_I)}{R_I} \times \frac{G(f, \Delta_1, g, \Delta_2, \tau)}{F(f, \Delta_1)}, \text{ where } \begin{cases} X(R_I) \sim \text{NB}(R_I \times k, k/(k + R)) \\ R_I \sim \text{NB}(k, k/(k + R)). \end{cases} \quad (3)$$

479 Below in Fig. 1 we show that the expectation value of  $n_3/n_2$  (which is  $E[X(R_I)/R_I]$   
 480 in the absence of TTIQ and scaled by a constant independent of  $k$  otherwise) is  
 481 equal to  $R$ , while the variance of  $n_3/n_2$  has the same  $k$ -dependent shape as the

482  
483  
484

negative binomial ( $n_2$ ), but with a slightly lower value. Therefore, we can confirm the Reviewer’s intuition that the mean is unaffected, but overdispersion will lead to increased uncertainty in our predictions.

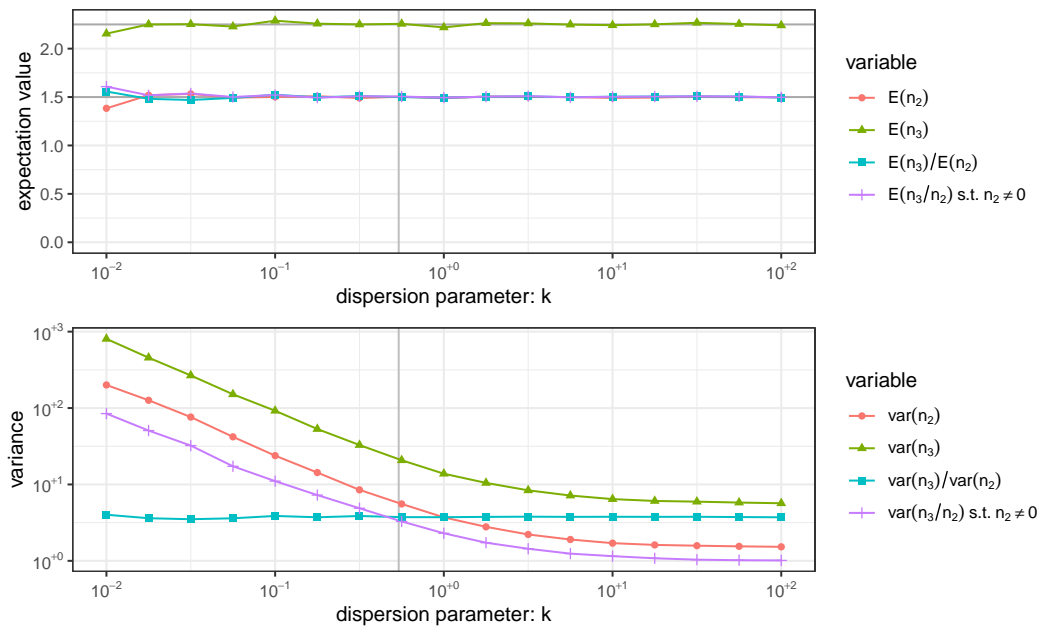

**Fig. 1** The impact of overdispersion on the effective reproduction number. The number of contacts per index and secondary cases follow the same negative binomial distribution with mean  $R = 1.5$  and dispersion parameter  $k$  (x-axis). Here we have assumed no TTIQ, such that  $F(f, \Delta 1) = G(f, \Delta 1, g, \Delta 2, \tau) = 1$ .

485  
486  
487  
488  
489  
490  
491  
492  
493  
494  
495  
496  
497  
498  
499  
500  
501  
502  
503

One effect that we do not consider, as also raised by Reviewer 1, is the finite capacity of contact tracing – such that contact tracers can become overwhelmed if an index case is in the tail of the contact number distribution. Such considerations, as described in our response to Reviewer 1, are beyond the scope of our paper as we do not want to make assumptions about contact tracing capacity.

In response to this Reviewer’s point, we have added the following paragraph to the discussion describing the small limitation imposed by assuming a fixed, rather than overdispersed  $R$ -value: “Assuming a fixed value of the baseline reproductive value  $R$  is a further limitation of our approach, as the impact of overdispersion of contact number distributions and superspreading is well documented for infectious disease dynamics (Lloyd-Smith et al., 2005). If we were to sample  $R$  for the index case and each secondary case from identical overdispersed negative binomial distributions, then the expectation value would be unchanged from our current approach: only the variance/uncertainty in our predictions would increase (S3 Appendix). The equivalence of expectation values could break down if we were to assume a finite capacity of contact tracing, such that the quarantined fraction of contacts of index cases with a large individual reproductive number may be less than  $g$ .”, as well as S3 Appendix *Supplementary results – Overdispersion* which covers the above reasoning and figure.

504  
505  
506  
507  
508

**Minor comment 2.1:** Line 39: Introduce TTIQ acronym first time appearing in summary

**Response:** Thank you. Corrected.

509 **Minor comment 2.2:** Line 64: “were” rather than “are”

510 **Response:** Thank you. Corrected.

511

512 **Minor comment 2.3:** Line 79: “Testing and quarantine do not...” rather than “Test-  
513 ing and tracing does not...”

514 **Response:** Thank you. Corrected.

515

516 **Minor comment 2.4:** Line 124: Might be worth explaining how this is a method-  
517 ological advance over Fraser et al (2004) by calling attention to a few specific details

518 **Response:** Thank you for the comment. In response to Reviwer 1’s comments  
519 (Minor 1.2), we have removed this reference from the introduction, and it is only  
520 present in the Discussion in the following form: “This difference can be attributed  
521 to Ferretti et al. (2020b)’s use of Fraser et al. (2004)’s approach to model contact  
522 tracing and isolation as independent events (i.e. tracing an index cases’ contacts  
523 says nothing about whether the index case has been isolated). Although this as-  
524 sumption leads to analytically tractable predictions of the reproductive number  
525 under TTIQ, it also leads to an overestimation of contact tracing’s impact (Fraser et  
526 al., 2004). Our approach can therefore be considered as a methodological advance  
527 over Fraser et al. (2004) and should be employed in the analysis of future epidemic  
528 scenarios.”

529

530 **Minor comment 2.5:** Line 145: Seems like the definition of the infectivity pro-  
531 file should include reference to symptomatic vs asymptomatic infection and clarify  
532 how it is defined in the case of an asymptomatic infection. Looks like it’s mentioned  
533 in the discussion, but probably worth stating in the methods

534 **Response:** The Reviewer raises an important point: the infectivity profile is  
535 not defined for asymptomatic cases as there is no symptom onset time to serve as  
536 the reference point. However, for our mathematical analysis this does not mat-  
537 ter: asymptomatic index cases are not isolated, so we do not have to truncate the  
538 infectivity profile to determine how many secondary infections occur. Hence we in-  
539 tegrate over the full infectivity profile  $p(t|\theta_p)$ , which, as a probability density func-  
540 tion, has an integral of one. The number of secondary infections per asymptomatic  
541 index case is  $R_a = \alpha R$ . As stated in the discussion, we do make the simplify-  
542 ing assumption that the generation time distribution  $q(t|\theta_q)$  is equivalent between  
543 symptomatic and asymptomatic infecteds, although the number of secondary cases  
544 per infected is different ( $R_s$  versus  $R_a$ ). We have now clarified this in *Materials*  
545 *and methods*: “The fraction of transmission that occurs before symptom onset in  
546 symptomatically-infected individuals is defined by the cumulative infectivity pro-  
547 file (or generation time) up to the time of symptom onset. The infectivity profile  
548 and incubation periods are undefined (and unnecessary) for asymptomatic cases,  
549 and in the model we make the simplifying assumption that the generation time  
550 distribution is the same between asymptomatic and symptomatic cases.”

551

552 **Minor comment 2.6:** Figure 1 is quite nice, but it’s a bit unclear what the y-axis is  
553 meant to represent. Is it the probability of generating a new case at time  $t$ ? Such that  
554 infecteds are more likely to generate new cases around the time of their symptom  
555 onset? This makes sense, even as it’s not explicitly incorporated into the distribu-  
556 tions used to generate Fig 1, but it’s worth a bit more explicit discussion. Also,  
557 in the event that the y axis does represent this transmission probability, it might  
558 be worth incorporating this into the timing of secondary cases in the figure such

559 that more of the secondary cases are generated around the time of highest infec-  
560 tiousness, but this is just a minor suggestion that might not be worth the effort to  
561 re-configure the figure.

562 **Response:** The y-axis in Figure 1 is indeed the probability density of generat-  
563 ing a new case at time  $t$ , which when appropriately scaled can also be interpreted  
564 as the infectiousness of the infected individual at a specific time. The illustrated  
565 distributions are schematic representations of the infectivity profile and/or gener-  
566 ation time distributions, which we now describe in the caption: “The distributions  
567 shown here are schematic representations of the infectivity profile and/or gener-  
568 ation time interval, which are quantitatively displayed in Fig I in S1 Appendix.  
569 These distributions reflect an individual’s infectiousness as a function of time.”

570 Furthermore, we have now included y-axis labels in Figure 1 such that it is clear  
571 that we are plotting the probability of generating a new case at time  $t$ . We have also  
572 clustered the infection of secondary contacts around the index case’s symptom on-  
573 set time, reflecting the index case’s infectivity profile.

574 **Minor comment 2.7:** Code and details such as coding language and additional  
575 software packages used should be made available in addition to the app

576 **Response:** All code used to generate this manuscript, including the manuscript  
577 text and code, is publicly available at <https://github.com/ashcroftp/COVID-TTIQ>  
578 and archived at <https://doi.org/10.5281/zenodo.4701470> as a single R-markdown  
579 document, which is now made clear in the data availability statement. Further-  
580 more, we have stored the data presented for each figure to be generated as human-  
581 readable CSV files.

582 **Minor comment 2.8:** Figure 2A: consider using color-blind friendly color palette

583 **Response:** Thanks for the suggestion, we have switched to the Okabe-Ito  
584 palette orange (#E69F00; high reproductive number) and blue (#0072B2; low re-  
585 productive number) in figures 2A, 5, S2, and S4.

586 **Minor comment 2.9:** Not sure if possible as I’m not familiar with LDA, but would  
587 be very interesting to perform the same analysis on pairs of parameters, i.e. could  
588 answer:  $f$  is most impactful, but what is the most impactful parameter that interacts  
589 with  $f$ ?

590 **Response:** This is an interesting idea. As LDA forms a linear map between  
591 the output ( $R_{TTIQ}$ ) and parameter inputs, parameter interactions are not accounted  
592 for by definition. To account for parameter interactions, one could include quadratic  
593 terms of the form e.g.  $f \times g$  as discriminators in the LDA. While this captures inter-  
594 actions between parameters, it makes the results harder to interpret as each indi-  
595 vidual parameter is present in five terms of the LDA projection. We do include this  
596 new analysis in Supplementary Figure S4, and we add the following to the results  
597 section following Figure 5: “Furthermore, as a linear approximation the LDA does  
598 not capture the effect of covariance between parameters. To capture these param-  
599 eter interactions, we can also include quadratic terms (e.g.  $f \times g$ ) as independent  
600 parameters in the LDA. From this analysis (S4 Fig), we see that the terms  $f \times \Delta_1$   
601 and  $g \times \Delta_2$  correlate positively with  $R_{TTIQ}$ , such that increasing the delays  $\Delta_1$   
602 and  $\Delta_2$  can negate the increase in TTIQ efficacy that is bought by increasing  $f$  or  $g$ , re-  
603 spectively.”

604 **Minor comment 2.10:** Line 394: “than” rather than “that”



609           **Response:** Thank you. Corrected.

610

611           **Minor comment 2.11:** Line 452: “contacts” rather than “contracts”

612           **Response:** Thank you. Corrected.

613

614           **Minor comment 2.12:** Might be worth adding a paragraph in the discussion sug-  
615 gesting ways to enact the most impactful TTIQ interventions. This would help  
616 translate the results into actionable policy for public health practitioners that may  
617 not fully understand the methods and approach. Widely available rapid testing for  
618 instance could be suggested as a way to increase f.

619 [1] Larremore, D. B., Wilder, B., Lester, E., Shehata, S., Burke, J. M., Hay, J. A., ... &  
620 Parker, R. (2021). Test sensitivity is secondary to frequency and turnaround time  
621 for COVID-19 screening. *Science advances*, 7(1), eabd5393.

622           **Response:** We agree with the Reviewer and Editor that this is a great idea. We  
623 have added the following text in the first paragraph of the discussion: “From a  
624 public health perspective, increasing the identification and speeding up the isola-  
625 tion of symptomatic index cases could be achieved through widely-available rapid  
626 testing. Despite the potentially lower sensitivity of rapid tests compared to RT-PCR  
627 tests, their effectiveness at reducing transmission has been demonstrated in simu-  
628 lation studies of index case isolation (Larremore et al., 2021).”

629
